# Supplementary figures and images for: VUV threshold photoelectron spectroscopy of SiS
Source: Royal Society of Chemistry journal article supplement (doi:10.1039/d5cp00494b), 2025-01-01

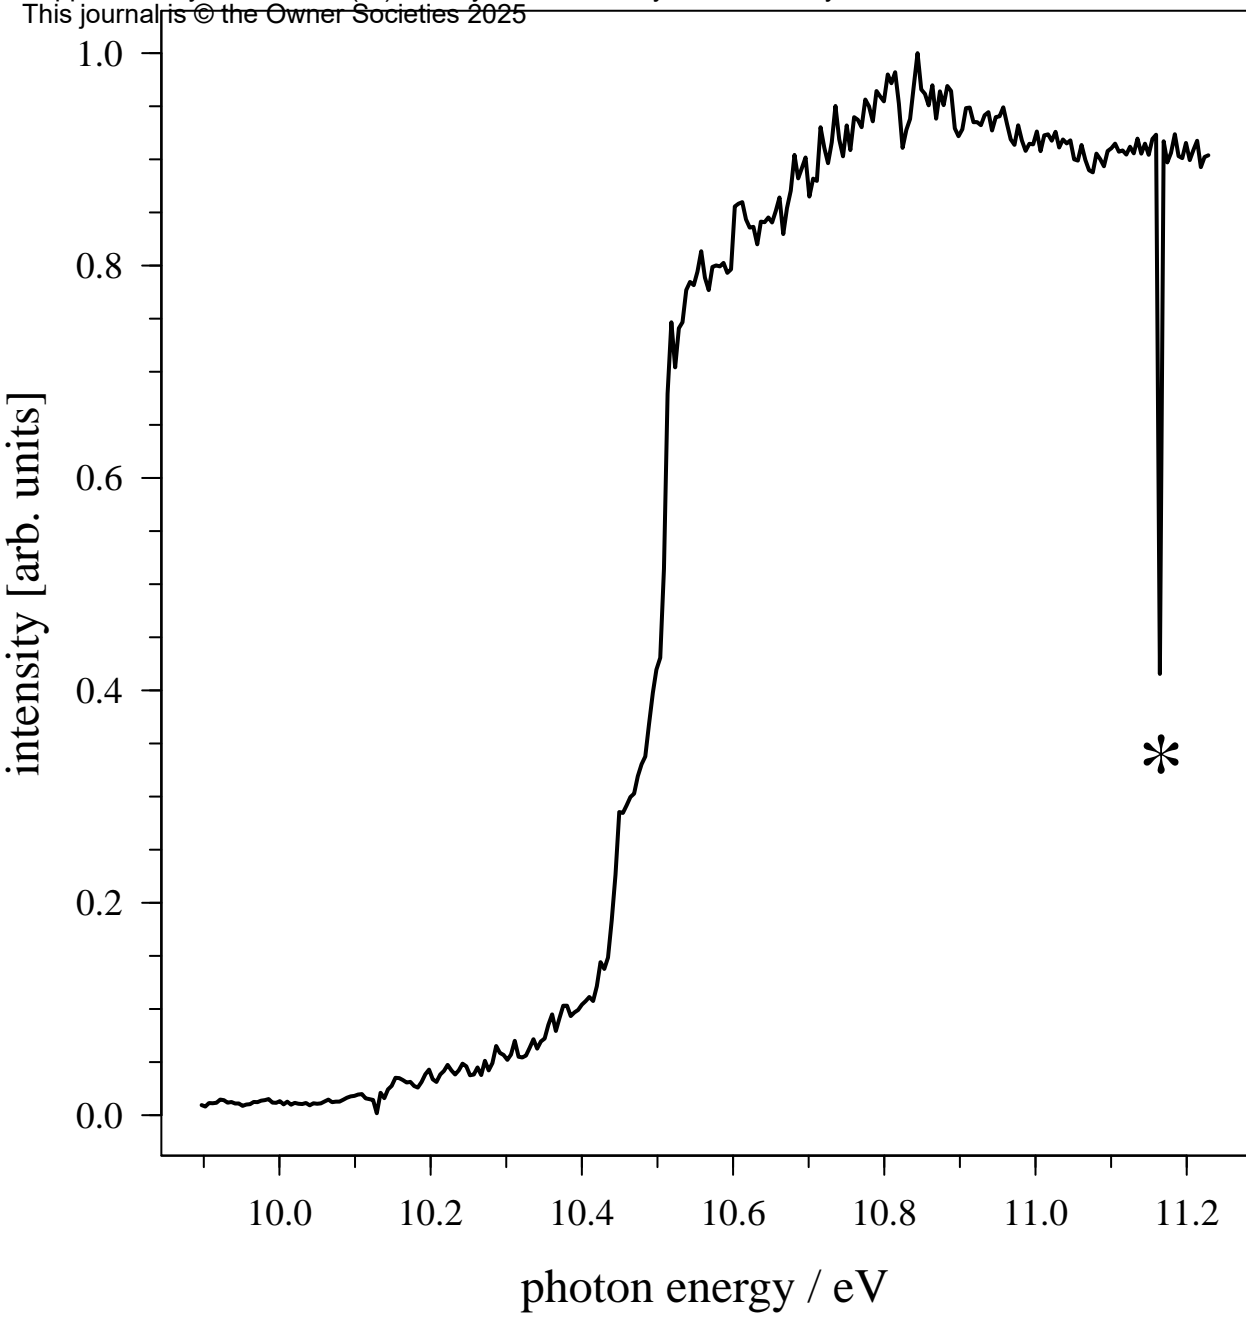

Supplement: d5cp00494b2.pdf [file d5cp00494b2.pdf]

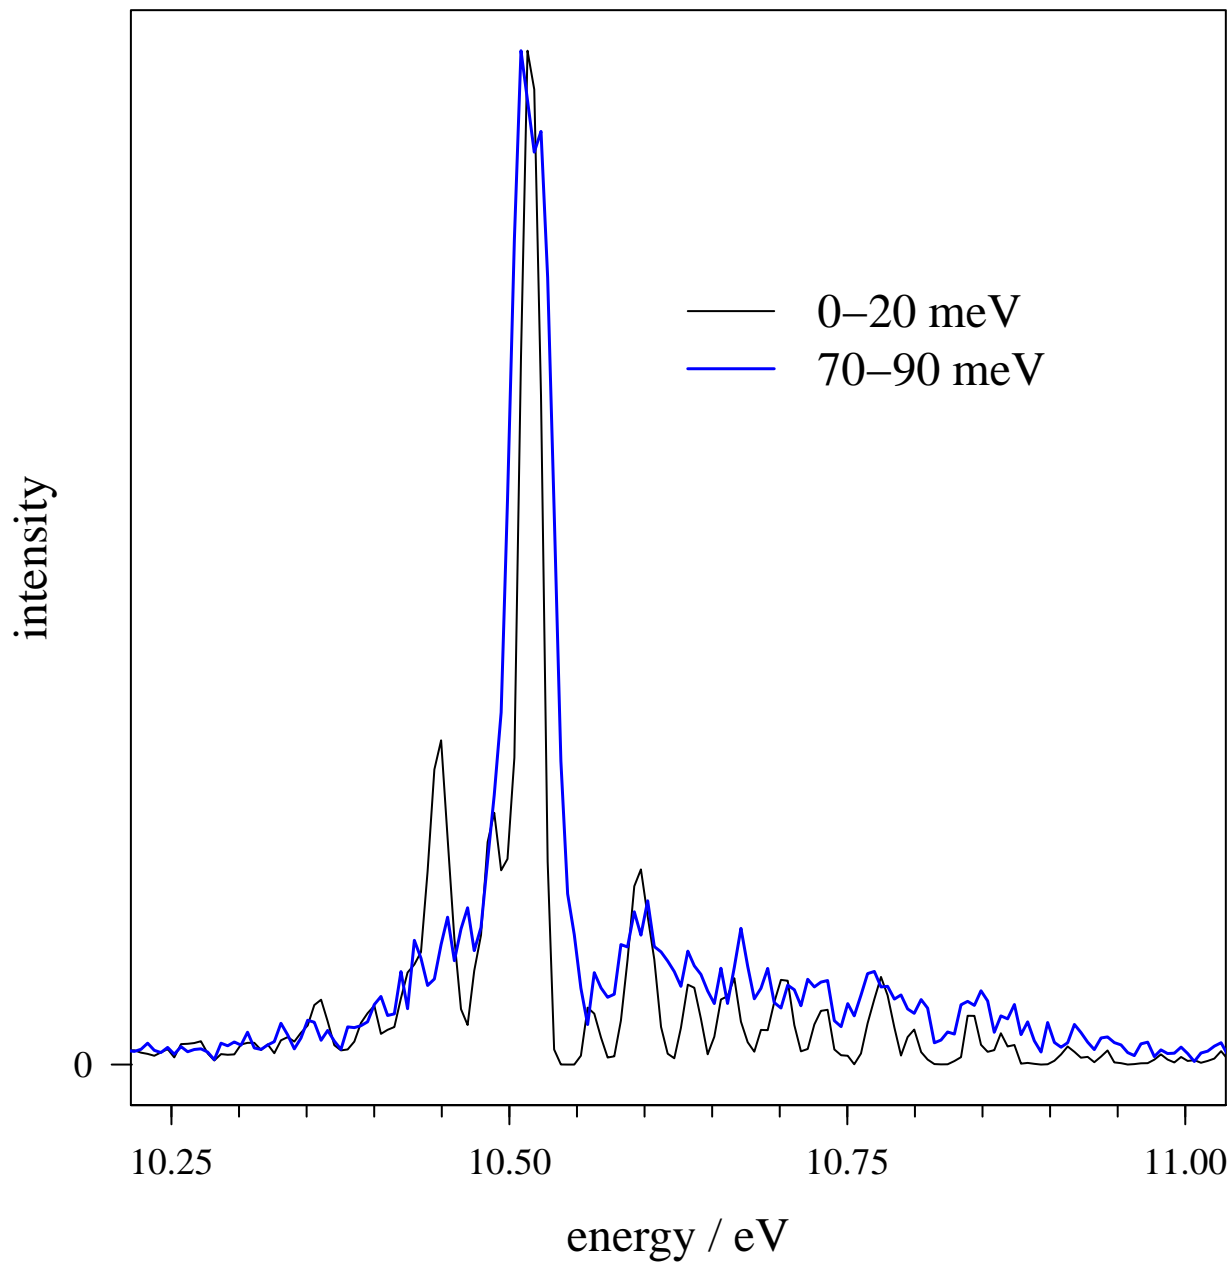

Supplement: d5cp00494b4.pdf [file d5cp00494b4.pdf]

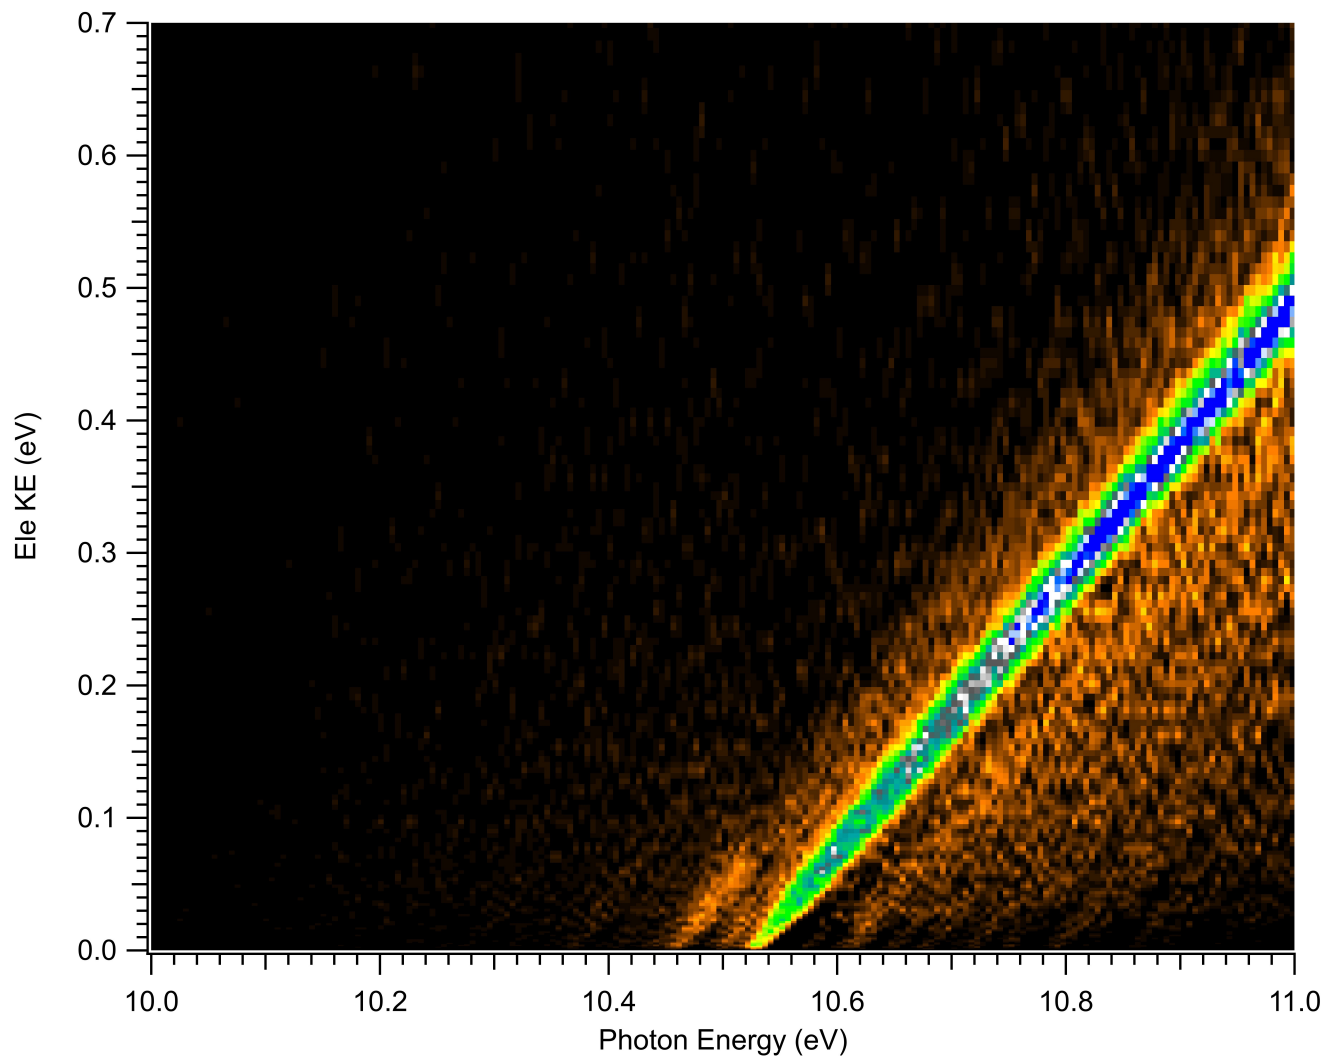

Supplement: d5cp00494b5.pdf [file d5cp00494b5.pdf]
